# Supplementary material for: Enhancing Variant Prioritization in VarFish through On-Premise Computational Facial Analysis
Source: MDPI journal article supplement (doi:10.3390/genes15030370), 2024-03-17
Supplement: s1 [file s1]

# Enhancing Variant Prioritization in VarFish through On-Premise Computational Facial Analysis

## Supplementary Material

Meghna Ahuja Bhasin <sup>1</sup>, Alexej Knaus <sup>1</sup>, Pietro Incardona <sup>1,2</sup>, Alexander Schmid <sup>1</sup>, Manuel Holtgrewe <sup>3</sup>, Miriam Elbracht <sup>4</sup>, Peter M. Krawitz <sup>1</sup> and Tzung-Chien Hsieh <sup>1,\*</sup>

<sup>1</sup> Institute for Genomic Statistics and Bioinformatics, University Hospital Bonn, Rheinische Friedrich-Wilhelms-Universität Bonn, Bonn, Germany;

<sup>2</sup> Core Unit for Bioinformatics Data Analysis, Medical Faculty, University of Bonn, Bonn, Germany

<sup>3</sup> CUBI – Core Unit Bioinformatics, Berlin Institute of Health, Berlin 10117, Germany;

<sup>4</sup> Institute for Human Genetics and Genomic Medicine, Medical Faculty, RWTH Aachen University, Aachen, Germany

\* Correspondence: [thsieh@uni-bonn.de](mailto:thsieh@uni-bonn.de)

### Instruction of starting each service in VarFish

1. To launch VarFish server, first clone the git repository from <https://github.com/ahujameg/varfish-server.git>

Then set the environment and start VarFish:

```
pipenv shell
pipenv sync
python manage.py runserver
```

Start celery in another terminal:

```
make celery
```

Start Vueapp in another terminal (first make sure NodeJS and NPM are installed):

```
cd <path to varfish-server>/varfish/vueapp
npm run build
npm run serve
```

2. To start CADD server, follow the VarFish documentation: [https://varfish-server.readthedocs.io/en/latest/admin\\_extras.html?highlight=CADD#install-scoring-with-cadd](https://varfish-server.readthedocs.io/en/latest/admin_extras.html?highlight=CADD#install-scoring-with-cadd)

Example request payload:

```
{
```

```

    "genome_build": "GRCh37",
    "cadd_release": "v1.6",
    "variant": [
        "1-25893242-TG-CA",
        "4-100544433-T-A",
        "8-19824667-CAC-TAA",
        ...
    ]
}

```

Example response:

```

{
    "result": "OK",
    "status": "finished",
    "scores": {
        "1-25893242-TG-CA": [
            -0.079176,
            1.612
        ],
        "4-100544433-T-A": [
            0.212352,
            6.022
        ],
        "8-19824667-CAC-TAA": [
            0.388051,
            8.268
        ],
    },
    "args": {
        "genome_build": "GRCh37",
        "cadd_release": "v1.6",
        "variants": [
            "1-25893242-TG-CA",
            "4-100544433-T-A",
            "8-19824667-CAC-TAA"
        ]
    },
    "info": {
        "cadd_rest_api_version": 0.1
    }
}

```

3. The implementation of CADA is available at <https://github.com/Chengyao-Peng/CADA> and it's web service can be accessed from here <https://cada.gene-talk.de/api/process>.

Example request payload:

```
{
  ["HP:0001167", "HP:000118"]
}
```

Example response:

```
{
  [
    {
      "genelid": 80155,
      "geneSymbol": "NAA15",
      "score": 0.255019928018252
    },
    {
      "genelid": 5058,
      "geneSymbol": "PAK1",
      "score": 0.2413779695828755
    },
    ...
  ]
}
```

4. To run the GestaltMatcher service, follow the steps mentioned here:  
<https://github.com/igsb/GestaltMatcher-Arc/tree/service#gestaltmatcher-rest-api>
5. To run PEDIA Middleware service, clone the repository at  
<https://github.com/igsb/pedia-middleware> Set the environment:

```
pipenv shell
pipenv sync
```

Start the application server on a different port than Varfish, for example on port 7000:

```
python manage.py runserver 7000
```

6. To run PEDIA classifier web service, clone the repository at  
<https://github.com/PEDIA-Charite/classifier>

Build docker image:

```
docker build -t pedia-api .
```

Run and listen the request in localhost:9000

```
docker run -p 9000:9000 pedia-api
```

Example request payload:

```
[
  {
    "gene_name": "TTN",
    "gene_id": 7273,
    "cada_score": 0.15950778339590344,
    "cadd_score": 23.9,
    "gestalt_score": 0.993,
    "label": "False"
  },
  {

```

```
    "gene_name": "CDC42BPA",
    "gene_id": 8476,
    "cada_score": 0.16774456841605048,
    "cadd_score": 18.5,
    "gestalt_score": 0.991,
    "label": "True"
  },
  ...
]
```

Example response:

```
[
  {
    "gene_name": "CDC42BPA",
    "gene_id": 8476,
    "pedia_score": 1.6125531907965023,
    "cadd_score": 18.5,
    "gestalt_score": 0.991,
    "cada_score": 0.16774456841605048,
    "label": 1
  },
  {
    "gene_name": "TTN",
    "gene_id": 7273,
    "pedia_score": 1.8549785017694944,
    "cadd_score": 23.9,
    "gestalt_score": 0.993,
    "cada_score": 0.15950778339590344,
    "label": 0
  },
  ...
]
```
